# Supplementary material
Source: Springer Nature journal article supplement (https://www.springermedizin.de/resource/supplementary/12889_2010_2721_MOESM3_ESM.pdf/9487428)

**Attitude**

- Job satisfaction (1S)
- Justness of system (2S)
- Importance of skills and support (2S)
- Attitude towards recovery time (2D)

**Social Norm**

- Influence of representative bodies, colleagues, society (3S)
- Production quality versus quantity (2D)

**Self-efficacy**

- Self-efficacy (1S)

**Barriers**

- Work pressure (1S)
- Emotional workload (1S)
- Decision authority (1S)
- Emotional exhaustion (1S)
- Office culture (2S)
- Quality (3S, 2D)
- Difficult clients (1S)

**Intention**

- Recovery and return to work (1S)
- Basic premises (2S)

**Knowledge**

- Information from OP (1S)
- Possessing, requesting and using sufficient information (3D)

**Assessment behaviour: process**

- Dedication (1S)
- Collecting information (1S, 3D)
- Conflict handling (1S, 2D)

**Assessment behaviour: assessment**

- Use of assessment instruments (3S, 2D)
- Client approach (3D)

**Background**

Gender, age, experience, training, specialisation, location, working hours, production, client industry, assessment type

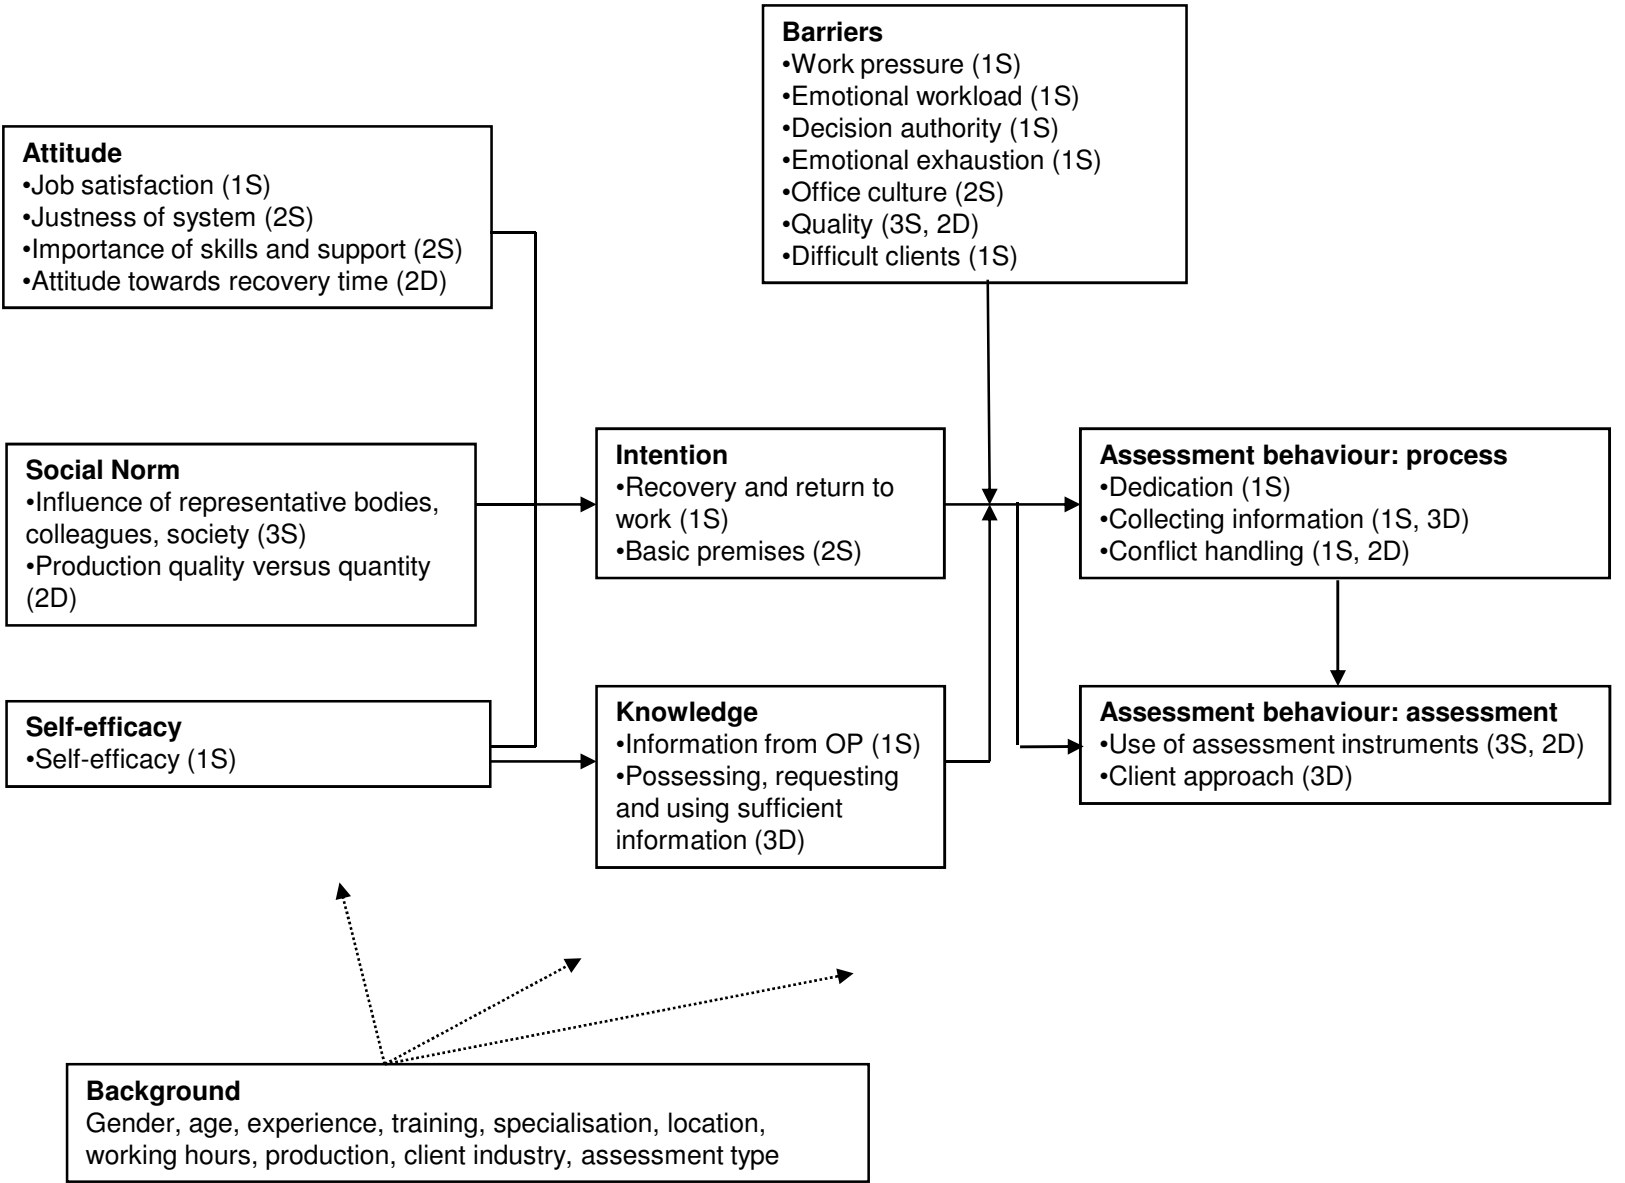

Supplement: MOESM3 [file 9487428]
